# Supplementary material for: Effects of the A117V mutation on the folding and aggregation of palindromic sequences (PrP113–120) in prion: insights from replica exchange molecular dynamics simulations
Source: Royal Society of Chemistry journal article supplement (doi:10.1039/c4mb00546e), 2014-12-01
Supplement: c4mb00546e1.pdf [file c4mb00546e1.pdf]

## Supplementary Materials

### Effects of the A117V mutation on the Folding and Aggregation of Palindromic Sequences (PrP113-120) in Prion: Insights from Replica Exchange Molecular Dynamics Simulations

Lulu Ning<sup>1</sup>, Qianqian Wang<sup>2</sup>, Yang Zheng<sup>1</sup>, Huangxiang Liu<sup>1,2\*</sup>, Xiaojun Yao<sup>1,3\*</sup>

<sup>1</sup>State Key Laboratory of Applied Organic Chemistry and Department of Chemistry,

Lanzhou University, Lanzhou 730000, China

<sup>2</sup>School of Pharmacy, Lanzhou University, Lanzhou 730000, China

<sup>3</sup>State Key Laboratory of Quality Research in Chinese Medicine, Macau Institute for

Applied Research in Medicine and Health, Macau University of Science and

Technology, Taipa, Macau, China

\*Corresponding author

Tel: +86-931-891-5756

Fax: +86-931-891-5685

E-mail: [hxliu@lzu.edu.cn](mailto:hxliu@lzu.edu.cn), [xjyao@lzu.edu.cn](mailto:xjyao@lzu.edu.cn)

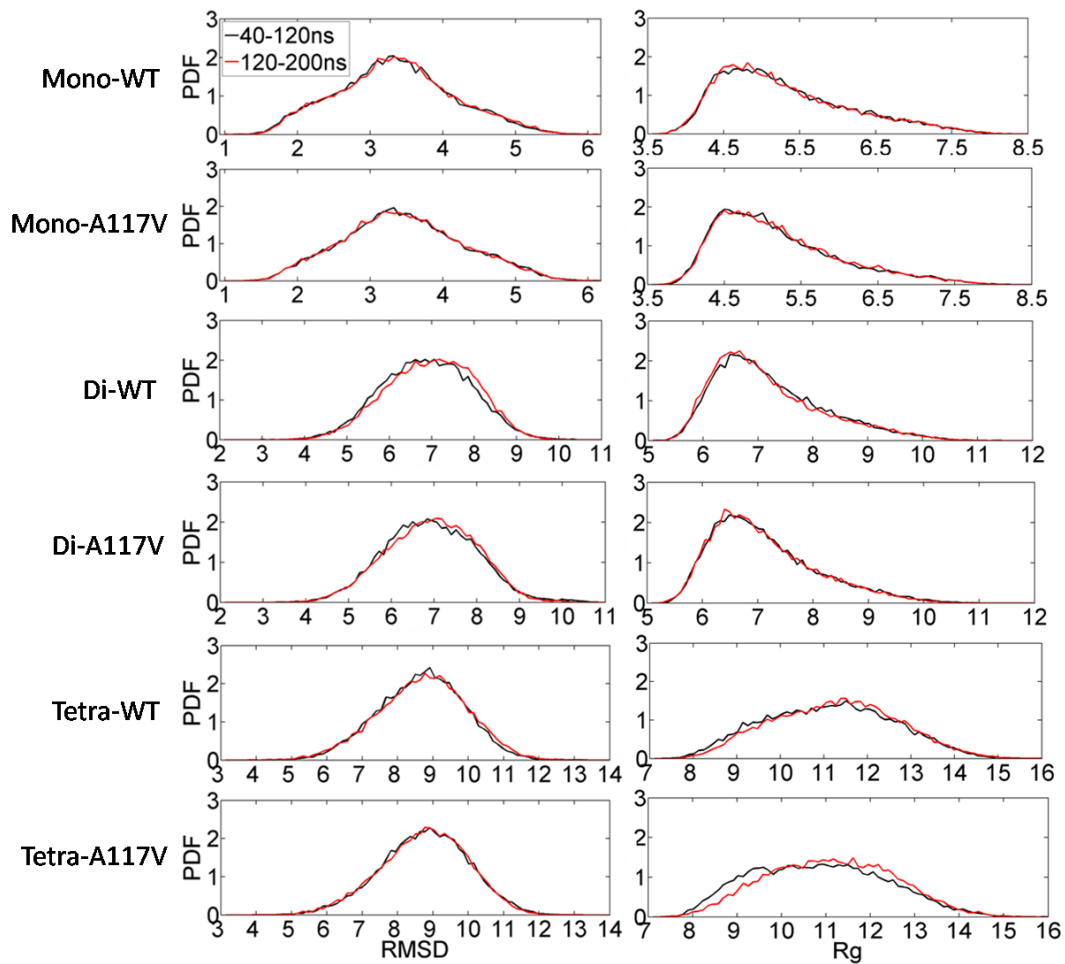

**Figure S1:** The convergence evaluation of REMD simulations for 1-, 2-, 4-peptide systems of the WT and A117V peptides. The respective convergence of the REMD simulations was rigorously checked by calculating the probability distribution functions (PDF) of backbone RMSD and backbone radius of gyration (Rg) within the two time intervals, 40-120 ns and 120-200 ns.

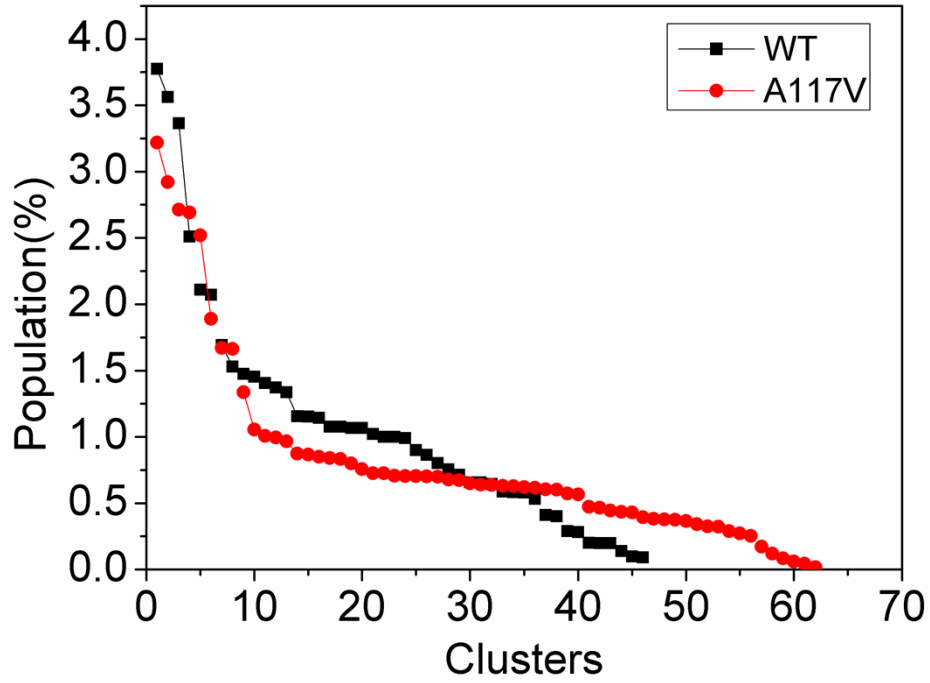

**Figure S2:** The populations of all clusters of the wild type (black) PrP113-120 and the A117V mutant (red).
